# Supplementary material
Source: Springer Nature journal article supplement (https://www.springermedizin.de/resource/supplementary/13256_2012_2245_MOESM1_ESM.pdf/9649384)

Ex: 3614  
Se: 5  
OM 12.75  
In: 20+C

DFOV 25.0cm  
STND/T/

R  
8  
1

kV 120  
mA 220

Head  
2.500mm/4i 8 row  
Tilt: 0.0

Ex:  
Se:  
In:

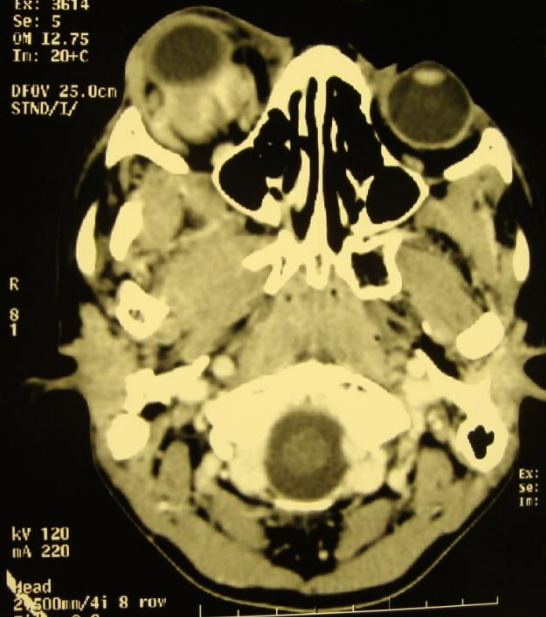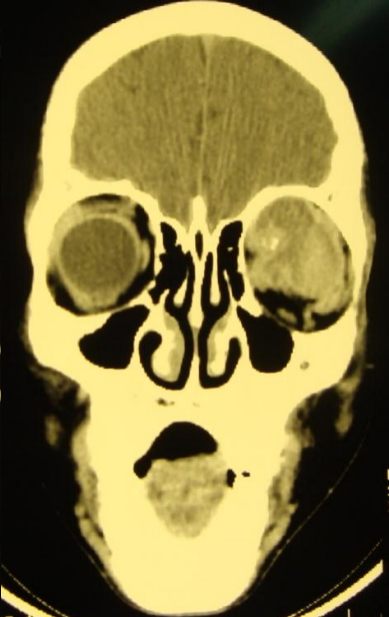

Supplement: MOESM1 [file 9649384]
